# Supplementary material
Source: Royal Society of Chemistry journal article supplement (doi:10.1039/d6tc00699j)
Supplement: d6tc00699j1.pdf [file d6tc00699j1.pdf]

## Supporting Information

### High-Performance Ultra-Flexible Organic Solar Cells Enabled by Transfer-Free Polyimide/ITO Integrated Electrodes

Jingyang Xiao,<sup>‡\*ab</sup> Jilong Yu,<sup>‡a</sup> Mingzhou Luo,<sup>a</sup> Wenlong Wu,<sup>a</sup> Kang An,<sup>c</sup> Chen Zhao,<sup>ab</sup> Wan-Yi Tan<sup>ab</sup> and Yonggang Min<sup>\*ab</sup>

<sup>a</sup> School of Materials and Energy, Guangdong University of Technology, Guangzhou 510006, China

<sup>b</sup> Guangdong Provincial Laboratory of Chemistry and Fine Chemical Engineering Jieyang Center, Jieyang, 515200, China

<sup>c</sup> State Key Laboratory of Luminescent Materials and Devices, School of Materials Science and Engineering, South China University of Technology, Guangzhou 510640, China

<sup>‡</sup> J. Xiao and J. Yu contributed equally to this work.

\* Corresponding author.

E-mail: [xiaojingyang@gdut.edu.cn](mailto:xiaojingyang@gdut.edu.cn) (J. Xiao), [ygmin@gdut.edu.cn](mailto:ygmin@gdut.edu.cn) (Y. Min).

## 1. Experimental Section

### Materials

The borosilicate glass was purchased from Luoyang Tengjing Co., Ltd. PET/ITO and glass/ITO substrates ( $15 \Omega/\square$ ) were purchased from Advanced Election Technology Co., Ltd. PM6 was purchased from Hyper PV Technology Co., Ltd, while Y6 and PDIN were purchased from Solarmer Materials Inc. 2,2'-Bis(trifluoromethyl)benzidine (TFMB), 3,3',4,4'-Biphenyl tetracarboxylic dianhydride (BPDA) were purchased from J&K Scientific and Huimai Material Technology Co., Ltd., respectively. All chemicals were used as received without further purification.

### Synthesis of Colorless Polyimide (PI)

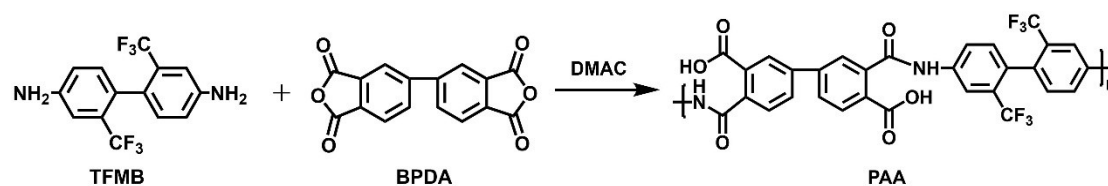

Scheme 1. Synthetic route for the PI precursor.

A typical two-step method was employed to synthesize colorless PI films, with a simple process similar to previous reports.[1] Taking poly(amic acid) (PAA) precursor solution with 25% solid content as an example, 3.2 g of TFMB and 2.9422 g of BPDA (molar ratio = 1:1) were introduced into a three-neck, round-bottomed flask filled with 18.4266 g of N,N-dimethylacetamide (DMAc) solvent, followed by stirring at room temperature for 8 hours. The resulting mixture was then subjected to vacuum defoaming to obtain a colorless PAA solution. The as-prepared PAA solution was spin-coated onto clean borosilicate glass substrates and pre-cured at 120°C for 30 min. Subsequently, a stepwise thermal annealing process was conducted in a muffle furnace

under nitrogen atmosphere to obtain PI films: the temperature was raised from room temperature to 300°C with a heating rate of 5°C/min, and then maintained for 80 min to complete imidization.

### **Device fabrication**

For the PI/ITO integrated transparent electrode, an ITO layer was deposited onto the PI film via magnetron sputtering method, following by thermal annealing at 250 °C for 30 min. The as-prepared PI/ITO substrate, commercially purchased PET/ITO and glass/ITO substrates were cleaned sequentially with detergent, deionized water and ethanol under sonication for 30 min each and dried at 60 °C in an oven overnight, followed by an oxygen plasma treatment of 10 min. A hole transport layer (HTL) was prepared by spin-coating PEDOT:PSS 4083 at 3000 rpm for 30 s onto the cleaned PI/ITO substrate. This was followed by thermal annealing in air, at 150 °C for 15 min. Afterwards, the substrates were transferred into an N<sub>2</sub>-filled glovebox. The PM6:Y6 blend solution (CF, 1:1.2 by weight, 6.5 mg/mL for PM6) was spin-coated at 3000 rpm for 30 s to form the photoactive layer, which was then thermal annealed on a hotplate at 110 °C for 10 min. Subsequently, a thin layer of electron transporting layer was deposited by spin-coating a methanol solution of PDIN (2 mg/mL) at 3000 rpm for 30 s onto the active layers. Finally, 100 nm of Ag electrode was thermally evaporated onto the device under vacuum. Prior to the Ag deposition, a shadow mask was carefully aligned onto the samples to define an active area of 0.0516 cm<sup>2</sup>.

### **Measurements and Instruments**

#### ***J-V* and EQE measurement**

The current density-voltage (*J-V*) characteristics were measured by a Keithley

2400 source meter, under 1 sun irradiation (AM 1.5G, 100 mW cm<sup>-2</sup>) using a solar simulator (XES-50S1, SAN-EI ELECTRIC, Japan). Before the  $J$ - $V$  tests, a physical mask with an aperture with precise area of 0.04 cm<sup>2</sup> was used to define the device area. The external quantum efficiency (EQE) curves were measured by an integrated QE measurement system (Enlitech, Taiwan, China).

### **Optical transmission spectra**

The optical transmission spectra of transparent electrodes on a quartz substrate were recorded by SHIMADZU UV-3600 Plus.

### **AFM characterization**

The AFM height and phase images were obtained by a Bruker Dimension Fast Scan.

### **SEM characterization**

The SEM images were obtained by an Apreo 2S HiVac scanning electron microscope (Thermo Fisher Scientific Brno s.r.o., Czech Republic).

## 2. Supplementary Figures

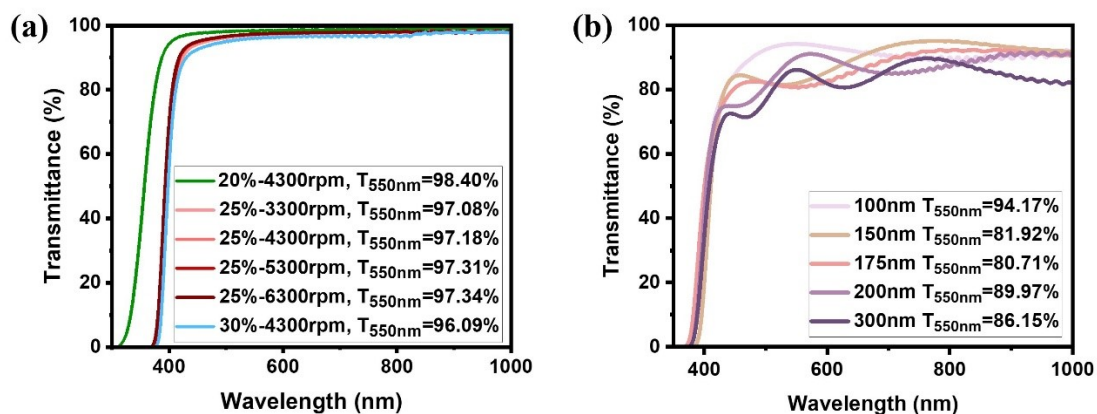

**Figure S1.** a) Transmittance of PI substrates fabricated with various spin-coating speeds and solid contents; b) Transmittance of PI/ITO integrated electrodes with various ITO thicknesses.

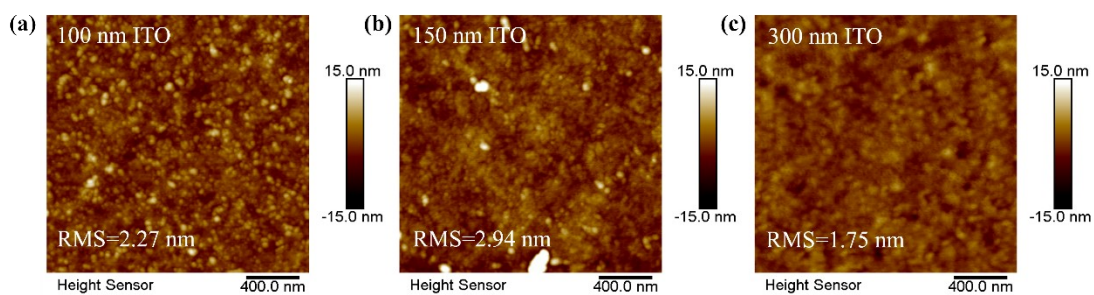

**Figure S2.** a) AFM images of PI/ITO integrated electrodes with ITO thickness of a) 100 nm; b) 150 nm; c) 300 nm.

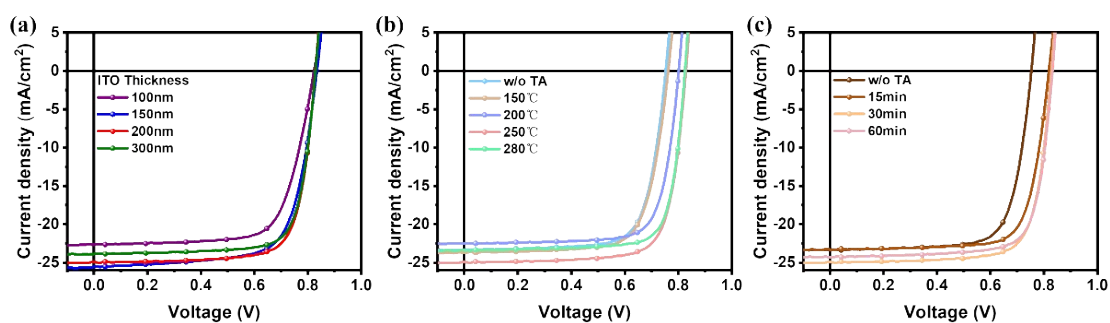

**Figure S3.** J-V characteristics of PI/ITO-based OSCs a) with different ITO thicknesses; b) with different thermal annealing temperatures for ITO; c) different thermal annealing durations for ITO.

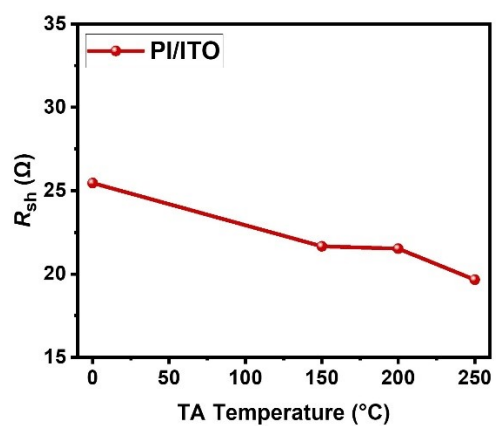

**Figure S4.** Variation of sheet resistance of PI/ITO electrodes with thermal annealing at different temperatures.

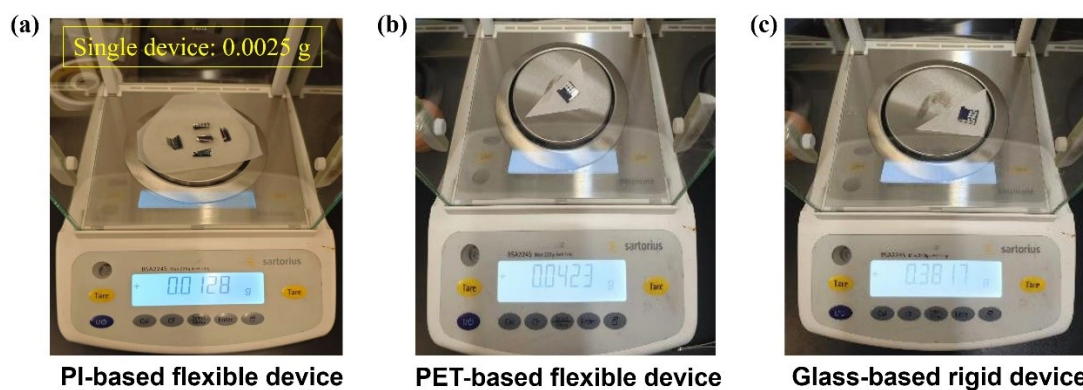

**Figure S5.** The images of OSC devices based on a) PI, b) PET, and c) glass substrates. Note: the average weight of a single PI-based device is 0.0025 g.

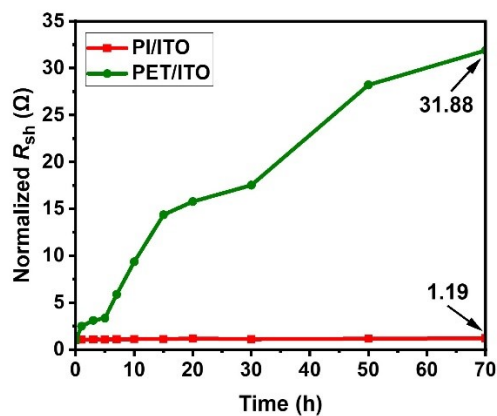

**Figure S6.** Normalized sheet resistance of different flexible transparent electrodes versus thermal annealing time.

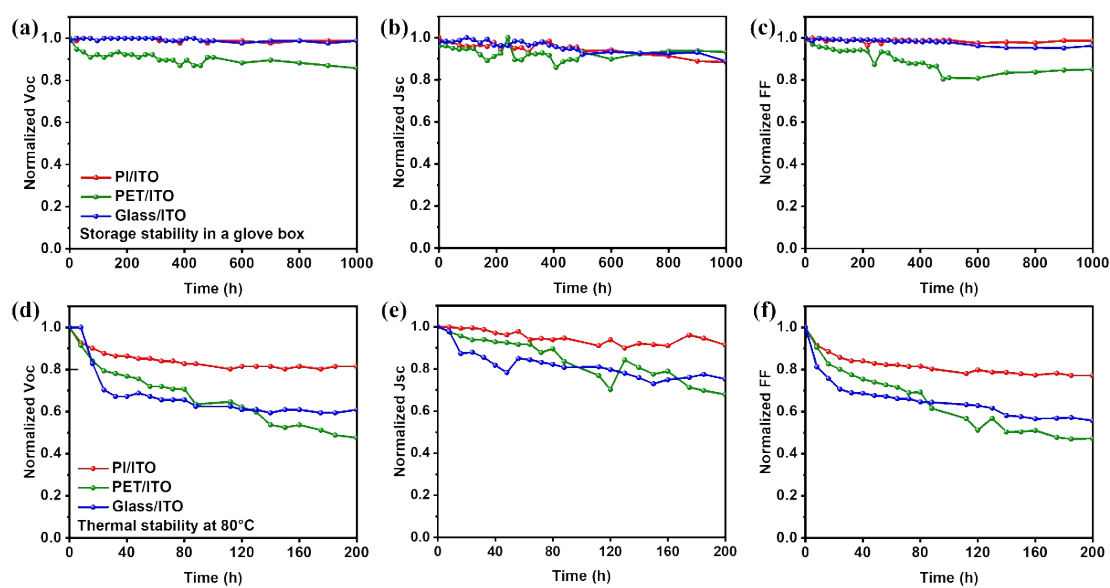

**Figure S7.** Normalized photovoltaic parameters of the OSCs fabricated with different transparent electrodes a-c) during storage stability test in an  $N_2$ -filled glovebox; d-f) under thermal stress at 80 °C.

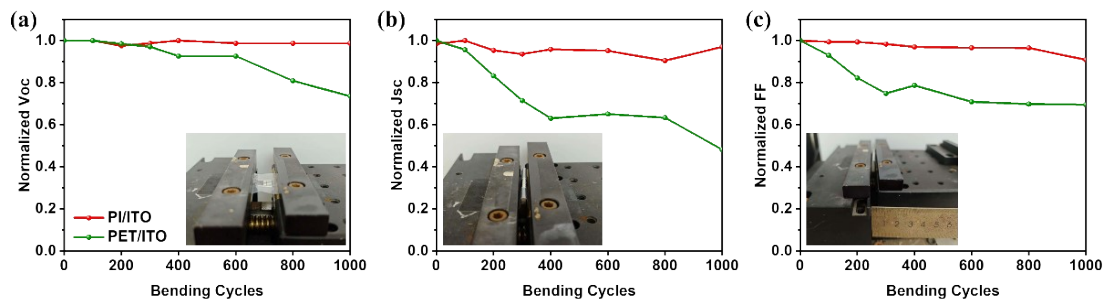

**Figure S8.** Normalized photovoltaic parameters of the OSCs fabricated with different transparent electrodes after various bending cycles with a bending radius of 4 mm. (Inserted images display the flat and bended states of flexible devices during the bending test.)

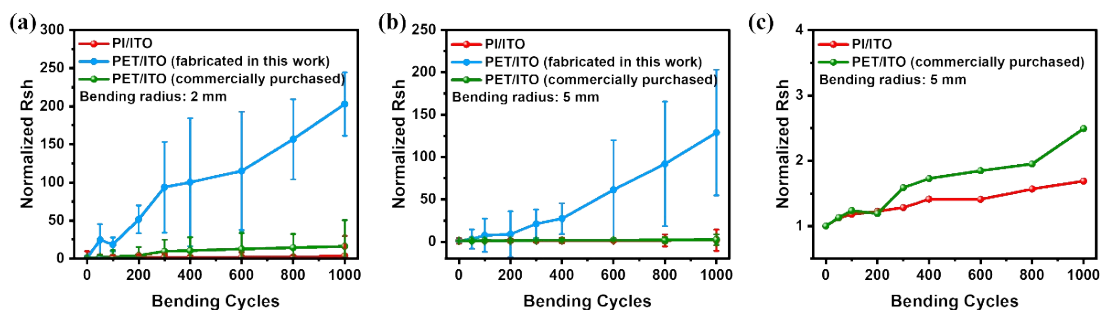

**Figure S9.** Normalized sheet resistance of different flexible transparent electrodes after various bending cycles at a bending radius of a) 2 mm; b, c) 5 mm.

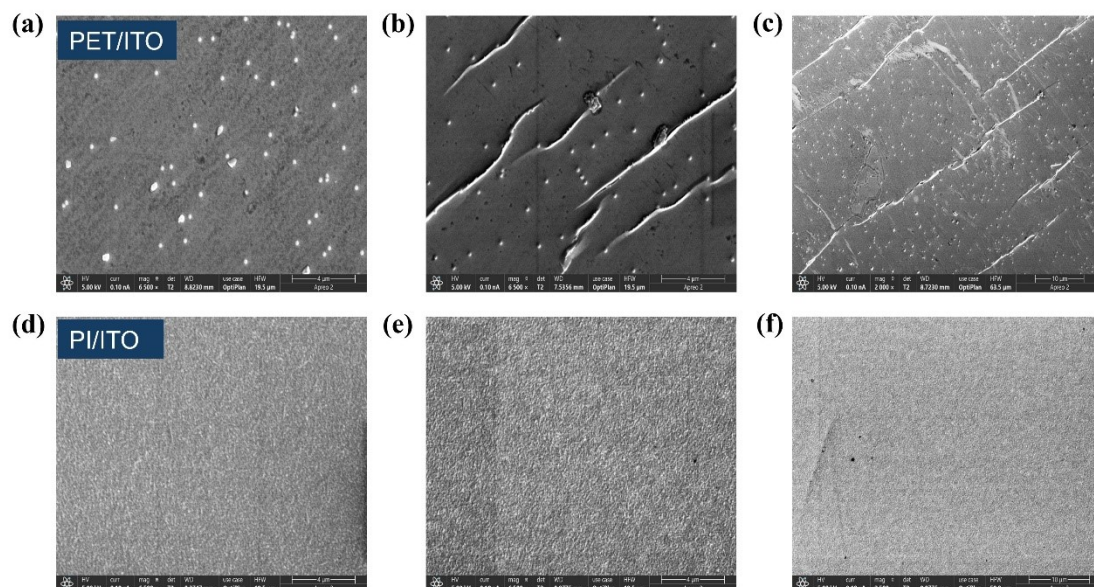

**Figure S10.** SEM image of PET/ITO (a) before and (b, c) after 500 bending cycles at a bending radius of 2 mm; SEM image of PI/ITO (d) before and (e, f) after the same bending test. The images are recorded at a scale of (a, b, d, e) 4  $\mu\text{m}$  and (c, f) 10  $\mu\text{m}$ .

### 3. Supplementary Tables

**Table S1.** Film thickness of PI substrates fabricated with various spin-coating speeds and solid contents.

| Solid Content (%) | Spin-coating Speed (rpm) | Film Thickness ( $\mu\text{m}$ ) |
|-------------------|--------------------------|----------------------------------|
| 20                | 6300                     | /                                |
|                   | 3300                     | 11                               |
| 25                | 4300                     | 9                                |
|                   | 5300                     | 7                                |
|                   | 6300                     | 5                                |
| 30                | 3300                     | 17                               |
|                   | 4300                     | 15                               |
|                   | 5300                     | 13                               |
|                   | 6300                     | 11                               |

**Table S2.** Sheet resistances of PI/ITO integrated electrodes with various ITO thicknesses, measured by four-point probe technique.

| Thickness (nm)                       | 100   | 150   | 175   | 200   | 300   |
|--------------------------------------|-------|-------|-------|-------|-------|
| R <sub>1</sub> ( $\Omega$ )          | 47.5  | 33.5  | 29.95 | 20.6  | 22.1  |
| R <sub>2</sub> ( $\Omega$ )          | 44.3  | 28    | 26.55 | 21.3  | 17.2  |
| R <sub>3</sub> ( $\Omega$ )          | 48.5  | 30.1  | 28.57 | 21.8  | 21.4  |
| R <sub>4</sub> ( $\Omega$ )          | 51.4  | 29.4  | 27.83 | 22    | 20.9  |
| R <sub>5</sub> ( $\Omega$ )          | 52.1  | 30.9  | 28.26 | 19.7  | 18.7  |
| R <sub>6</sub> ( $\Omega$ )          | 56.7  | 33.7  | 28.30 | 22.6  | 18.8  |
| R <sub>7</sub> ( $\Omega$ )          | 45.2  | 28.4  | 26.48 | 19.1  | 16.5  |
| R <sub>8</sub> ( $\Omega$ )          | 50.8  | 32.6  | 28.94 | 22.2  | 23.4  |
| R <sub>9</sub> ( $\Omega$ )          | 57.1  | 34.1  | 33.55 | 24.5  | 20.1  |
| R <sub>10</sub> ( $\Omega$ )         | 53.0  | 30.5  | 31.30 | 22.4  | 19.5  |
| Average R <sub>sh</sub> ( $\Omega$ ) | 50.66 | 31.12 | 28.97 | 21.62 | 19.86 |

**Table S3.** Photovoltaic parameters of PI/ITO-based OSCs with different ITO thicknesses, measured under AM 1.5G irradiation.

| Thickness (nm) | $V_{oc}^{a)}$ (V) | $J_{sc}^{a)}$ (mA·cm <sup>-2</sup> ) | FF <sup>a)</sup> (%) | PCE <sup>a)</sup> (%) |
|----------------|-------------------|--------------------------------------|----------------------|-----------------------|
| 100            | 0.82              | 25.02                                | 67.20                | 13.74                 |
|                | (0.82±0.00)       | (24.76±0.32)                         | (67.05±3.24)         | (13.62±0.79)          |
| 150            | 0.83              | 25.55                                | 71.12                | 15.16                 |
|                | (0.83±0.00)       | (24.81±0.61)                         | (71.78±1.97)         | (14.82±0.28)          |
| 200            | 0.83              | 24.93                                | 76.23                | 15.75                 |
|                | (0.83±0.01)       | (24.74±0.36)                         | (75.60±1.00)         | (15.45±0.18)          |
| 300            | 0.83              | 23.88                                | 76.89                | 15.22                 |
|                | (0.83±0.00)       | (23.57±0.25)                         | (75.88±1.07)         | (14.79±0.20)          |

a) The values in parentheses represent statistical data obtained from ten devices.

**Table S4.** Photovoltaic parameters of PI/ITO-based OSCs with different thermal annealing temperatures for ITO, measured under AM 1.5G irradiation.

| TA temperature (°C) | $V_{oc}^{a)}$ (V) | $J_{sc}^{a)}$ (mA·cm <sup>-2</sup> ) | FF <sup>a)</sup> (%) | PCE <sup>a)</sup> (%) |
|---------------------|-------------------|--------------------------------------|----------------------|-----------------------|
| w/o annealing       | 0.75              | 23.56                                | 73.81                | 13.00                 |
|                     | (0.75±0.01)       | (23.00±0.56)                         | (71.62±2.66)         | (12.31±0.87)          |
| 150°C               | 0.77              | 23.67                                | 73.36                | 13.24                 |
|                     | (0.77±0.01)       | (22.47±0.61)                         | (73.94±0.75)         | (12.72±0.29)          |
| 200°C               | 0.80              | 22.51                                | 76.16                | 13.76                 |
|                     | (0.79±0.02)       | (23.09±0.79)                         | (75.04±1.21)         | (13.62±0.11)          |
| 250°C               | 0.83              | 24.93                                | 76.23                | 15.75                 |
|                     | (0.83±0.01)       | (24.74±0.36)                         | (75.60±1.00)         | (15.45±0.18)          |
| 280°C               | 0.82              | 23.39                                | 78.02                | 15.05                 |
|                     | (0.82±0.00)       | (23.19±0.35)                         | (76.70±0.78)         | (14.60±0.31)          |

a) The values in parentheses represent statistical data obtained from ten devices.

**Table S5.** Photovoltaic parameters of PI/ITO-based OSCs with different thermal annealing durations for ITO, measured under AM 1.5G irradiation.

| TA time       | $V_{oc}^{a)}$ (V) | $J_{sc}^{a)}$ (mA·cm <sup>-2</sup> ) | FF <sup>a)</sup> (%) | PCE <sup>a)</sup> (%) |
|---------------|-------------------|--------------------------------------|----------------------|-----------------------|
| w/o annealing | 0.75              | 23.56                                | 73.81                | 13.00                 |
|               | (0.75±0.01)       | (23.00±0.56)                         | (71.62±2.66)         | (12.31±0.87)          |
| 15 min        | 0.82              | 23.29                                | 75.63                | 14.43                 |
|               | (0.83±0.01)       | (22.48±1.13)                         | (72.86±2.20)         | (13.56±0.64)          |
| 30 min        | 0.83              | 24.93                                | 76.23                | 15.75                 |
|               | (0.83±0.01)       | (24.74±0.36)                         | (75.60±1.00)         | (15.45±0.18)          |
| 60 min        | 0.83              | 24.29                                | 76.40                | 15.44                 |
|               | (0.83±0.01)       | (23.89±0.62)                         | (75.08±1.44)         | (14.89±0.38)          |

a) The values in parentheses represent statistical data obtained from ten devices.

**Table S6.** Photovoltaic parameters of the reported flexible OSCs based on PM6:Y6.

| Device   | Electrode          | Thickness ( $\mu\text{m}$ ) | $V_{\text{OC}}$ (V) | $J_{\text{SC}}$ ( $\text{mA}\cdot\text{cm}^{-2}$ ) | FF (%) | PCE (%) | Ref       |
|----------|--------------------|-----------------------------|---------------------|----------------------------------------------------|--------|---------|-----------|
| Rigid    | Glass/ITO          | /                           | 0.84                | 24.89                                              | 74.37  | 15.75   | [2]       |
| Flexible | PET/PH1000         | /                           | 0.83                | 23.57                                              | 72.03  | 14.07   |           |
| Rigid    | Glass/ITO          | /                           | 0.84                | 25.53                                              | 67.80  | 14.47   | [3]       |
| Flexible | Flexible/AgNWs-GV  | 125                         | 0.84                | 23.54                                              | 73.20  | 14.42   |           |
| Rigid    | Glass/ITO          | /                           | 0.83                | 25.43                                              | 74.50  | 15.71   | [4]       |
| Flexible | PET/FlexAgNE/ZnO   | 125                         | 0.83                | 24.87                                              | 74.30  | 15.32   |           |
| Rigid    | Glass/ITO          | /                           | 0.82                | 25.9                                               | 73     | 15.4    | [5]       |
| Flexible | PI/ITO             | 1.4                         | 0.83                | 25.7                                               | 72     | 15.2    |           |
| Flexible | PET/AgNWs/ZnO:PVP  | 125                         | 0.82                | 24.58                                              | 74.45  | 15.01   | [6]       |
| Rigid    | Glass/ITO          | /                           | 0.84                | 25.67                                              | 72     | 15.43   | [7]       |
| Flexible | PEN/PEDOT:PSS      | 1.3                         | 0.84                | 25.36                                              | 70     | 15.03   |           |
| Flexible | PEN/AgNWs          | 125                         | 0.83                | 25.40                                              | 71     | 15.03   | [8]       |
| Rigid    | Glass/ITO          | /                           | 0.83                | 25.66                                              | 73.75  | 15.78   | [9]       |
| Flexible | Em-Ag/AgNWs:AZO-SG | 125                         | 0.83                | 25.05                                              | 72.97  | 15.21   |           |
| Flexible | PET/PEDOT:PSS      | 125                         | 0.83                | 24.80                                              | 66.00  | 13.62   | [10]      |
| Rigid    | Glass/ITO          | /                           | 0.84                | 26.78                                              | 71.43  | 16.08   | [11]      |
| Flexible | PET/PEDOT:PSS      | /                           | 0.83                | 23.21                                              | 68.63  | 12.59   |           |
| Rigid    | Glass/ITO          | /                           | 0.85                | 25.00                                              | 74.00  | 15.70   | [12]      |
| Flexible | PI/Graphene        | 25                          | 0.84                | 25.80                                              | 70.20  | 15.20   |           |
| Flexible | PI/AgNW            | 20                          | 0.82                | 24.71                                              | 66.17  | 13.40   | [13]      |
| Rigid    | Glass/ITO          | /                           | 0.83                | 25.81                                              | 74.94  | 16.05   | This work |
| Flexible | PI/ITO/PEDOT:PSS   | 5                           | 0.83                | 25.44 <sup>a</sup>                                 | 76.23  | 16.10   |           |

<sup>a</sup> The integrated  $J_{\text{SC}}$  derived from EQE measurement.

## References

- [1] Y. Wang, Q. Chen, G. Zhang, C. Xiao, Y. Wei, W. Li, Ultrathin Flexible Transparent Composite Electrode via Semi-embedding Silver Nanowires in a Colorless Polyimide for High-Performance Ultraflexible Organic Solar Cells, *ACS Appl. Mater. Interfaces* 14 (4) (2022) 5699-5708.
- [2] T. Yan, W. Song, J. Huang, R. Peng, L. Huang, Z. Ge, 16.67% Rigid and 14.06% Flexible Organic Solar Cells Enabled by Ternary Heterojunction Strategy, *Adv. Mater.* 31 (39) (2019) 1902210.

- [3] Z. Wang, Y. Han, L. Yan, C. Gong, J. Kang, H. Zhang, X. Sun, L. Zhang, J. Lin, Q. Luo, C. Q. Ma, High Power Conversion Efficiency of 13.61% for 1 cm<sup>2</sup> Flexible Polymer Solar Cells Based on Patternable and Mass - Producing Gravure - Printed Silver Nanowire Electrodes, *Adv. Funct. Mater.* 31 (4) (2021) 2007276.
- [4] Y. Sun, L. Meng, X. Wan, Z. Guo, X. Ke, Z. Sun, K. Zhao, H. Zhang, C. Li, Y. Chen, Flexible High - Performance and Solution - Processed Organic Photovoltaics with Robust Mechanical Stability, *Adv. Funct. Mater.* 31 (16) (2021) 2010000.
- [5] S. Xiong, K. Fukuda, S. Lee, K. Nakano, X. Dong, T. Yokota, K. Tajima, Y. Zhou, T. Someya, Ultrathin and Efficient Organic Photovoltaics with Enhanced Air Stability by Suppression of Zinc Element Diffusion, *Adv. Sci.* 9 (8) (2022) 2105288.
- [6] Z. Wang, J. Guo, Y. Pan, J. Fang, C. Gong, L. Mo, Q. Luo, J. Lin, C. Ma, Manipulating the Macroscopic and Microscopic Morphology of Large - Area Gravure - Printed ZnO Films for High - Performance Flexible Organic Solar Cells, *Energy Environ. Mater.* 7 (2) (2023) e12592.
- [7] Y. Li, R. Wen, P. Li, X. Fan, Metallic and Low-Work-Function PEDOT:PSS Cathodes for Flexible Organic Solar Cells Exhibiting Over 15% Efficiency and High Stability, *ACS Appl. Energy Mater.* 5 (6) (2022) 7692-7700.
- [8] F. Qin, W. Wang, L. Sun, X. Jiang, L. Hu, S. Xiong, T. Liu, X. Dong, J. Li, Y. Jiang, J. Hou, K. Fukuda, T. Someya, Y. Zhou, Robust metal ion-chelated polymer interfacial layer for ultraflexible non-fullerene organic solar cells, *Nat. Commun.* 11 (1) (2020) 4508.
- [9] X. Chen, G. Xu, G. Zeng, H. Gu, H. Chen, H. Xu, H. Yao, Y. Li, J. Hou, Y. Li, Realizing Ultrahigh Mechanical Flexibility and >15% Efficiency of Flexible Organic Solar Cells via a "Welding" Flexible Transparent Electrode, *Adv. Mater.* 32 (14) (2020) 1908478.
- [10] R. Wen, H. Huang, J. Wan, S. Wen, J. Wang, X. Fan, High-Efficiency Stable Flexible Organic Solar Cells with PEDOT:PSS Electrodes via Superacid Fumigation Treatment, *Energy Technol.* 9 (11) (2021) 2100595.
- [11] V. G. Sree, T. Gokulnath, B. Yadagiri, J. I. Sohn, H.-S. Kim, C. Bathula, Highly efficient halogen-free rigid and flexible binary organic solar cells using new solid indacene additive, *Mater. Today Phys.* 47 (2024) 101538.
- [12] D. Koo, S. Jung, J. Seo, G. Jeong, Y. Choi, J. Lee, S. M. Lee, Y. Cho, M. Jeong, J. Lee, J. Oh, C. Yang, H. Park, Flexible Organic Solar Cells Over 15% Efficiency with Polyimide-Integrated Graphene Electrodes, *Joule* 4 (5) (2020) 1021-1034.
- [13] Z. Shen, X. Liang, Y. Fan, G. Lin, T. Gu, H. Huo, Y. Wang, Z. Tang, W. Su, X. Xu, L. Hou, Ultra-flexible high-efficiency organic solar cells based on polyimide electrodes and all-polymer blends, *Appl. Phys. Lett.* 126 (10) (2025) 103301.
